# Supplementary material for: Observation of anomalous Hall effect in Mn3GaN p-wave magnet
Source: Research Square preprint supplement (doi:10.21203/rs.3.rs-6465494/v1), 2025-05-05
Supplement: Supplementary file 1 [file 3eadd53d6d044e7824f80135.docx]

**Supplementary information**

Observation of anomalous Hall effect in Mn3GaN P-wave magnet

Jingyao Wang1, 2, #, Kewen Shi1, 2, #, *, Yuhao Jiang1, 2, #, Ying Sun3, Sihao Deng4, Jin Cui1, Hongde Wang2, Wenlong Cai1, 2, Daoqian Zhu1, 2, Guang Yang1, 2, Christoph Sürgers5, Weisheng Zhao1, 2, *, Cong Wang 1, 2, *

1 National Key Lab of Spintronics, International Innovation Institute, Beihang University, Hangzhou, 311115, PR China

2 School of Integrated Circuit Science and Engineering, Beihang University, Beijing, 100191, PR China

3School of Physics, Beihang University, Beijing, 100191, PR China

4Spallation Neutron Source Science Center, Dongguan, 523803, PR China

5Physikalisches Institut, Karlsruhe Institute of Technology, Karlsruhe, 76049, Germany

# These authors contributeequally.

* Corresponding authors: [shikewen@buaa.edu.cn](mailto:shikewen@buaa.edu.cn); [congwang@buaa.edu.cn](mailto:congwang@buaa.edu.cn); [weisheng.zhao@buaa.edu.cn](mailto:weisheng.zhao@buaa.edu.cn)


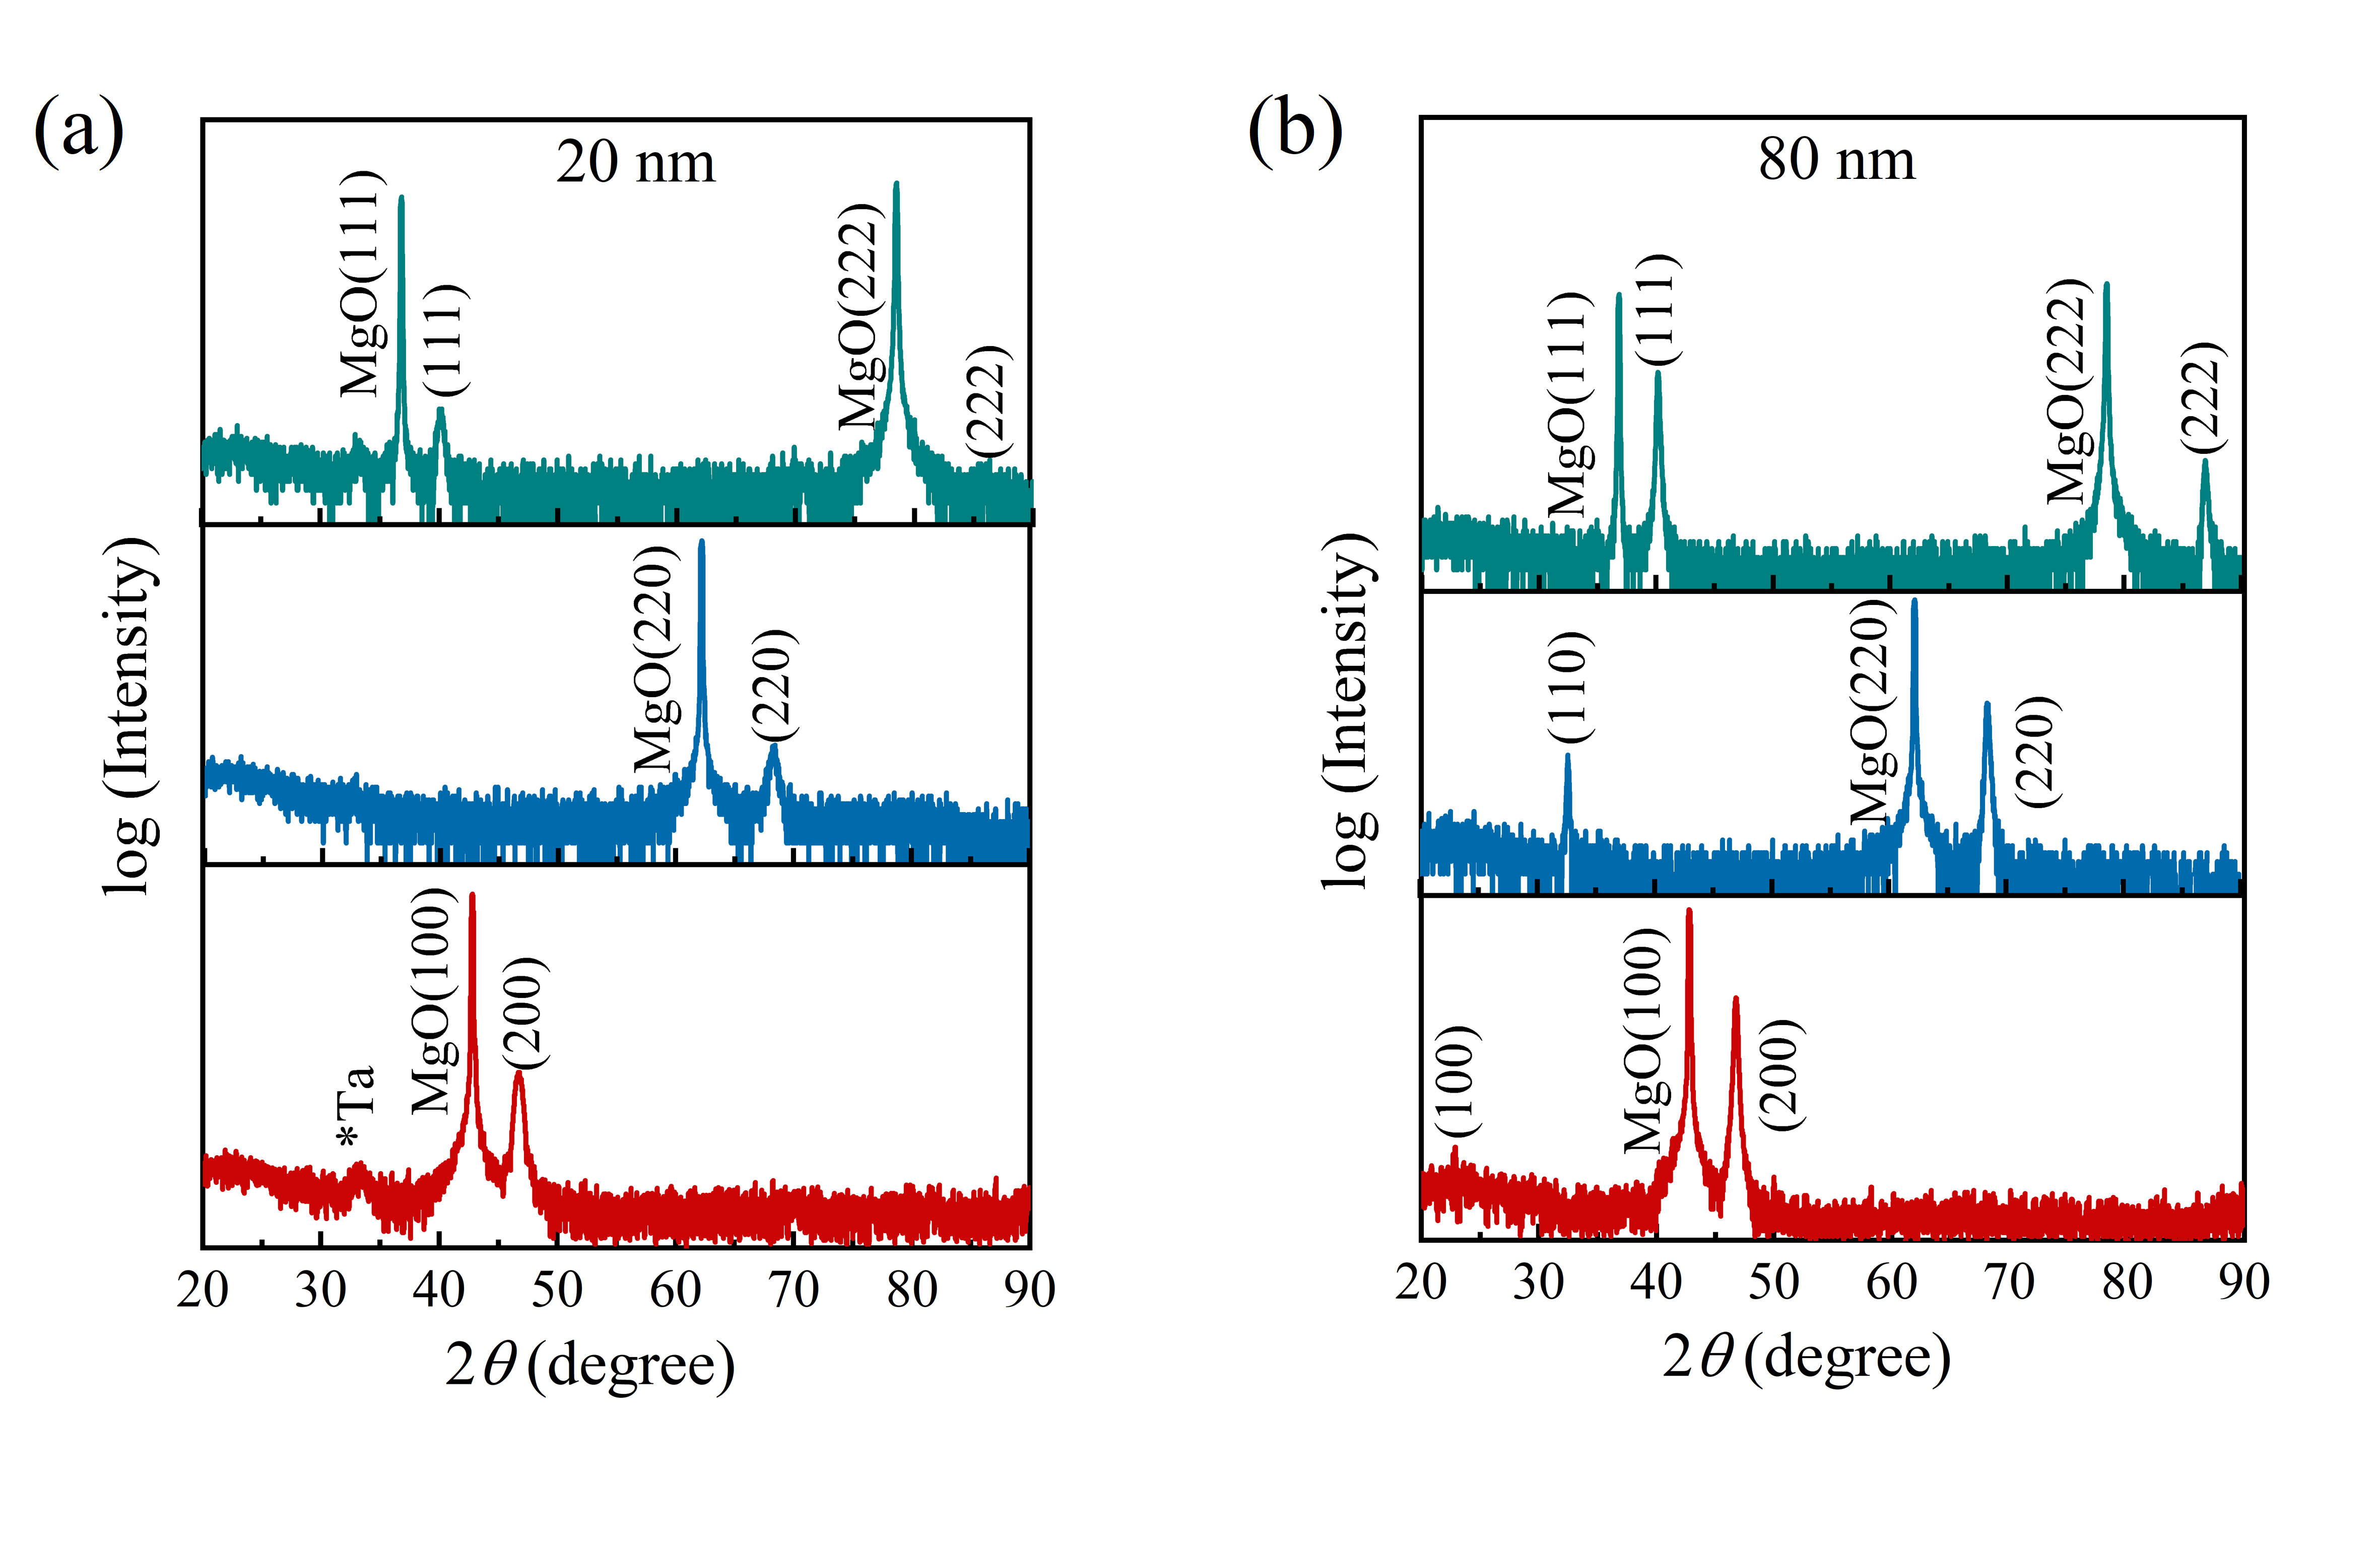


**Supplementary Fig. 1** Specular *θ*-2*θ* diffraction patterns of different orientations of **a,** 20 nm-thick and **b,** 80 nm-thick Mn3GaN films at room temperature.


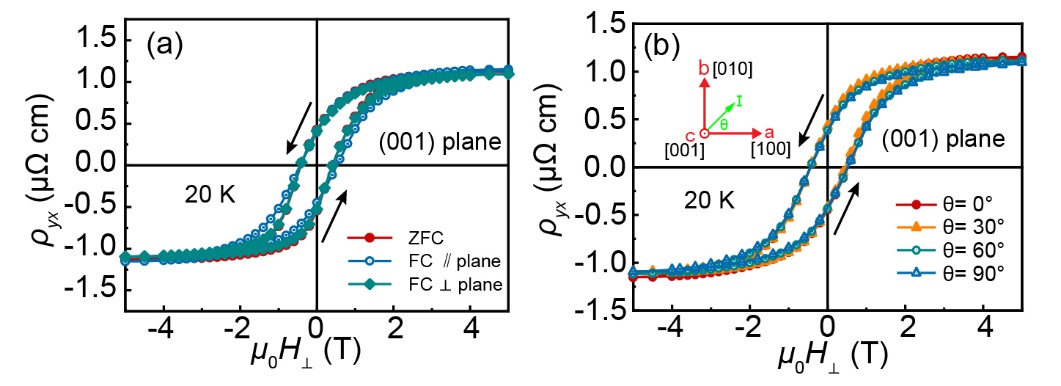


**Supplementary Fig. 2** **a,** Anomalous Hall resistivity (*ρ*yx) loops under different cooling conditions: zero-field cooling (ZFC), field cooling (FC) parallel and normal to the film plane, respectively. **b,** *ρ*yx loops for (001)-oriented films with the current applied along different in-plane crystallographic directions.


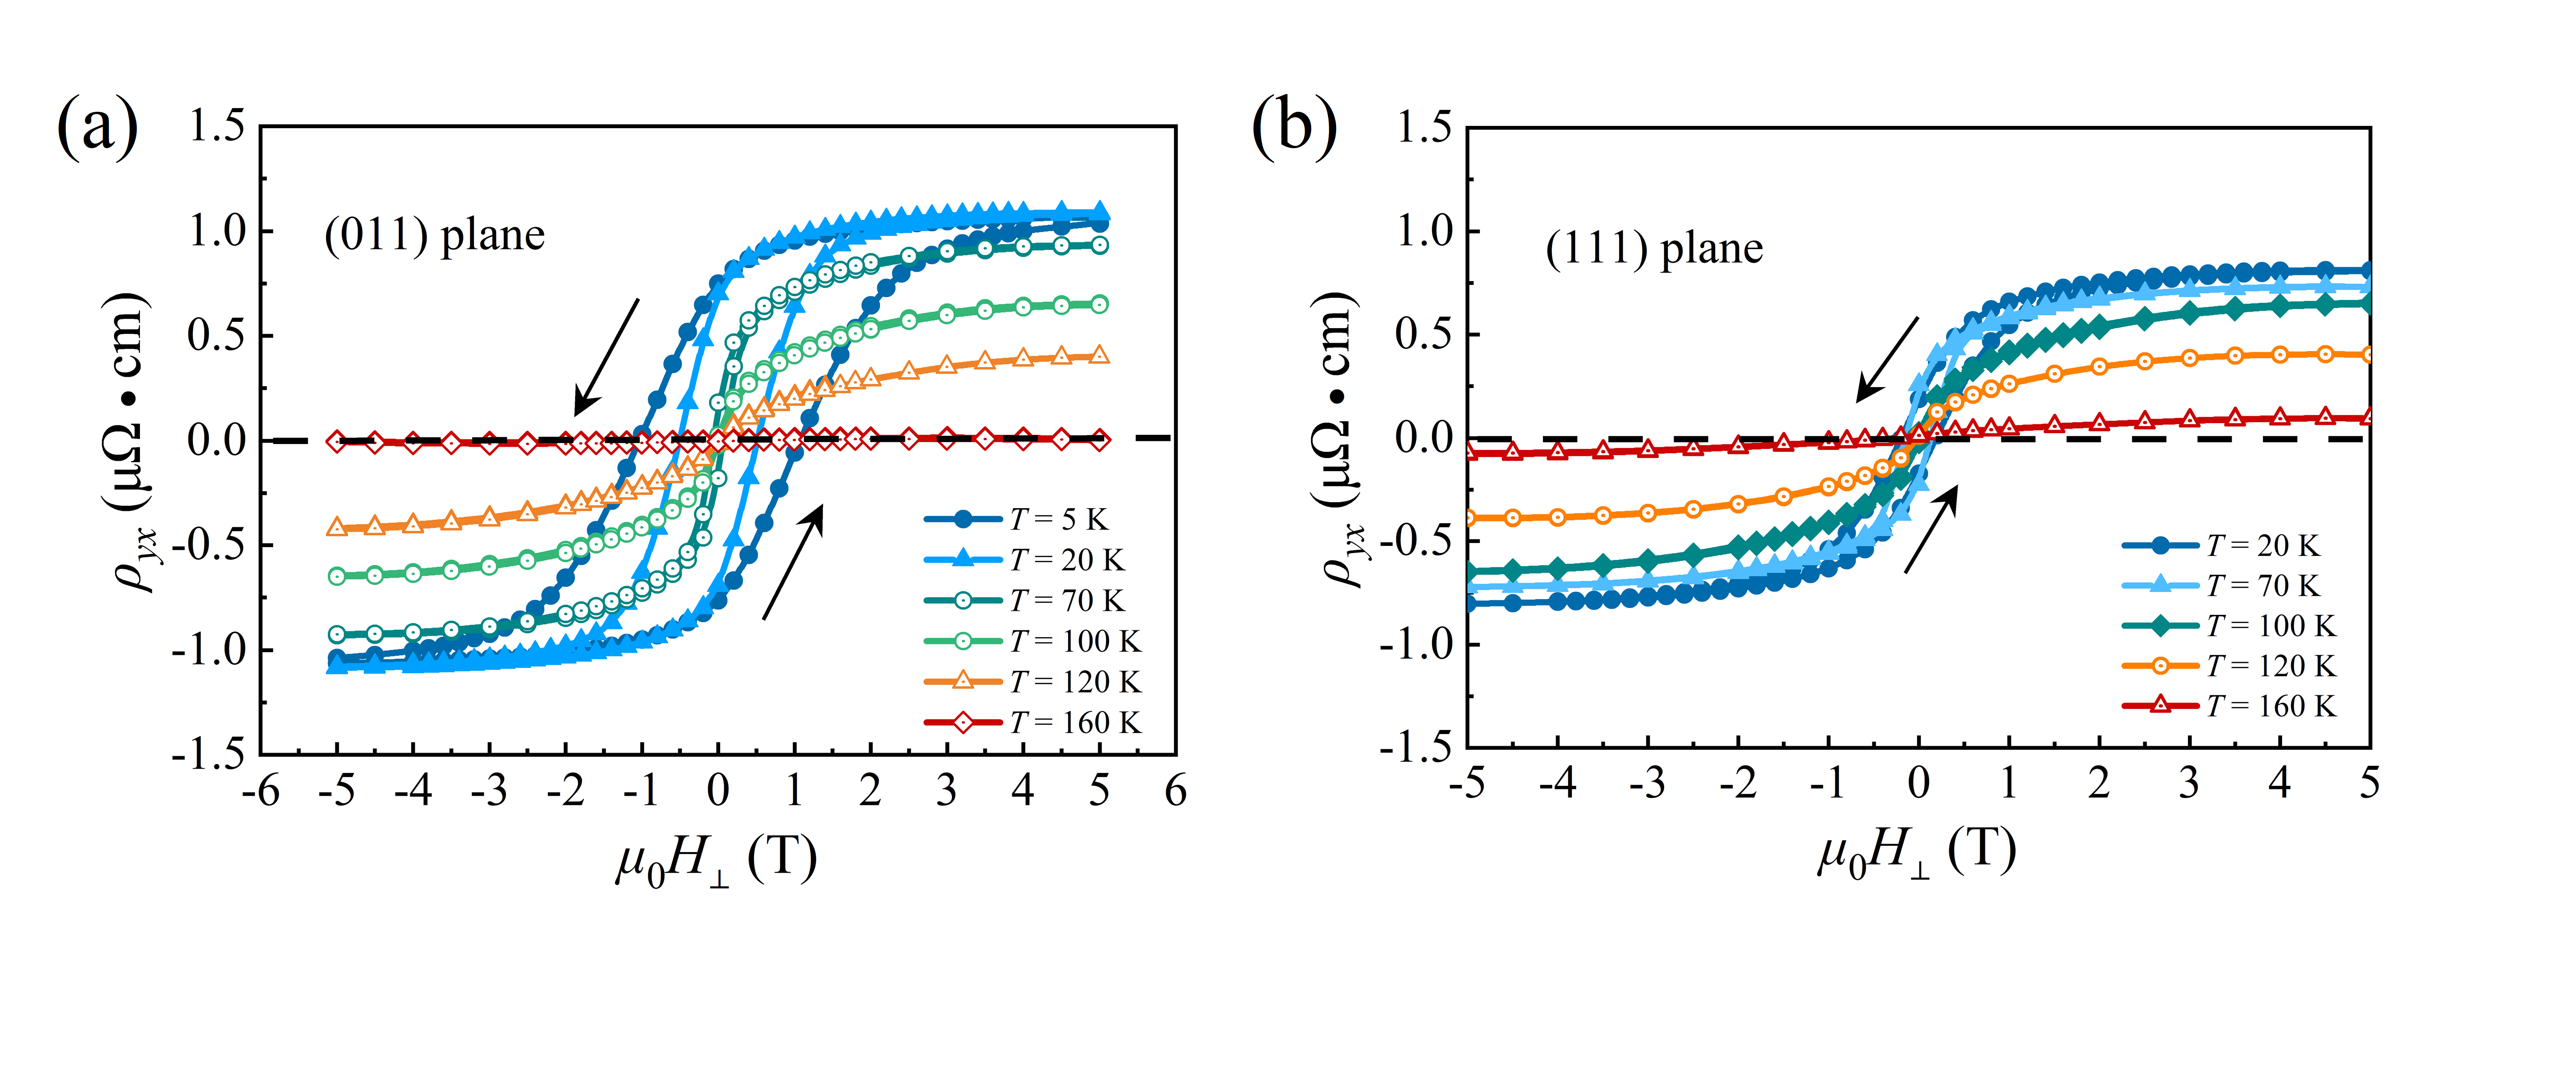


**Supplementary Fig. 3** Anomalous Hall resistivity (*ρ*yx) loops of 40 nm-thin **a,** (011)-oriented and **b,** (111)-oriented Mn3GaN films at various temperatures.


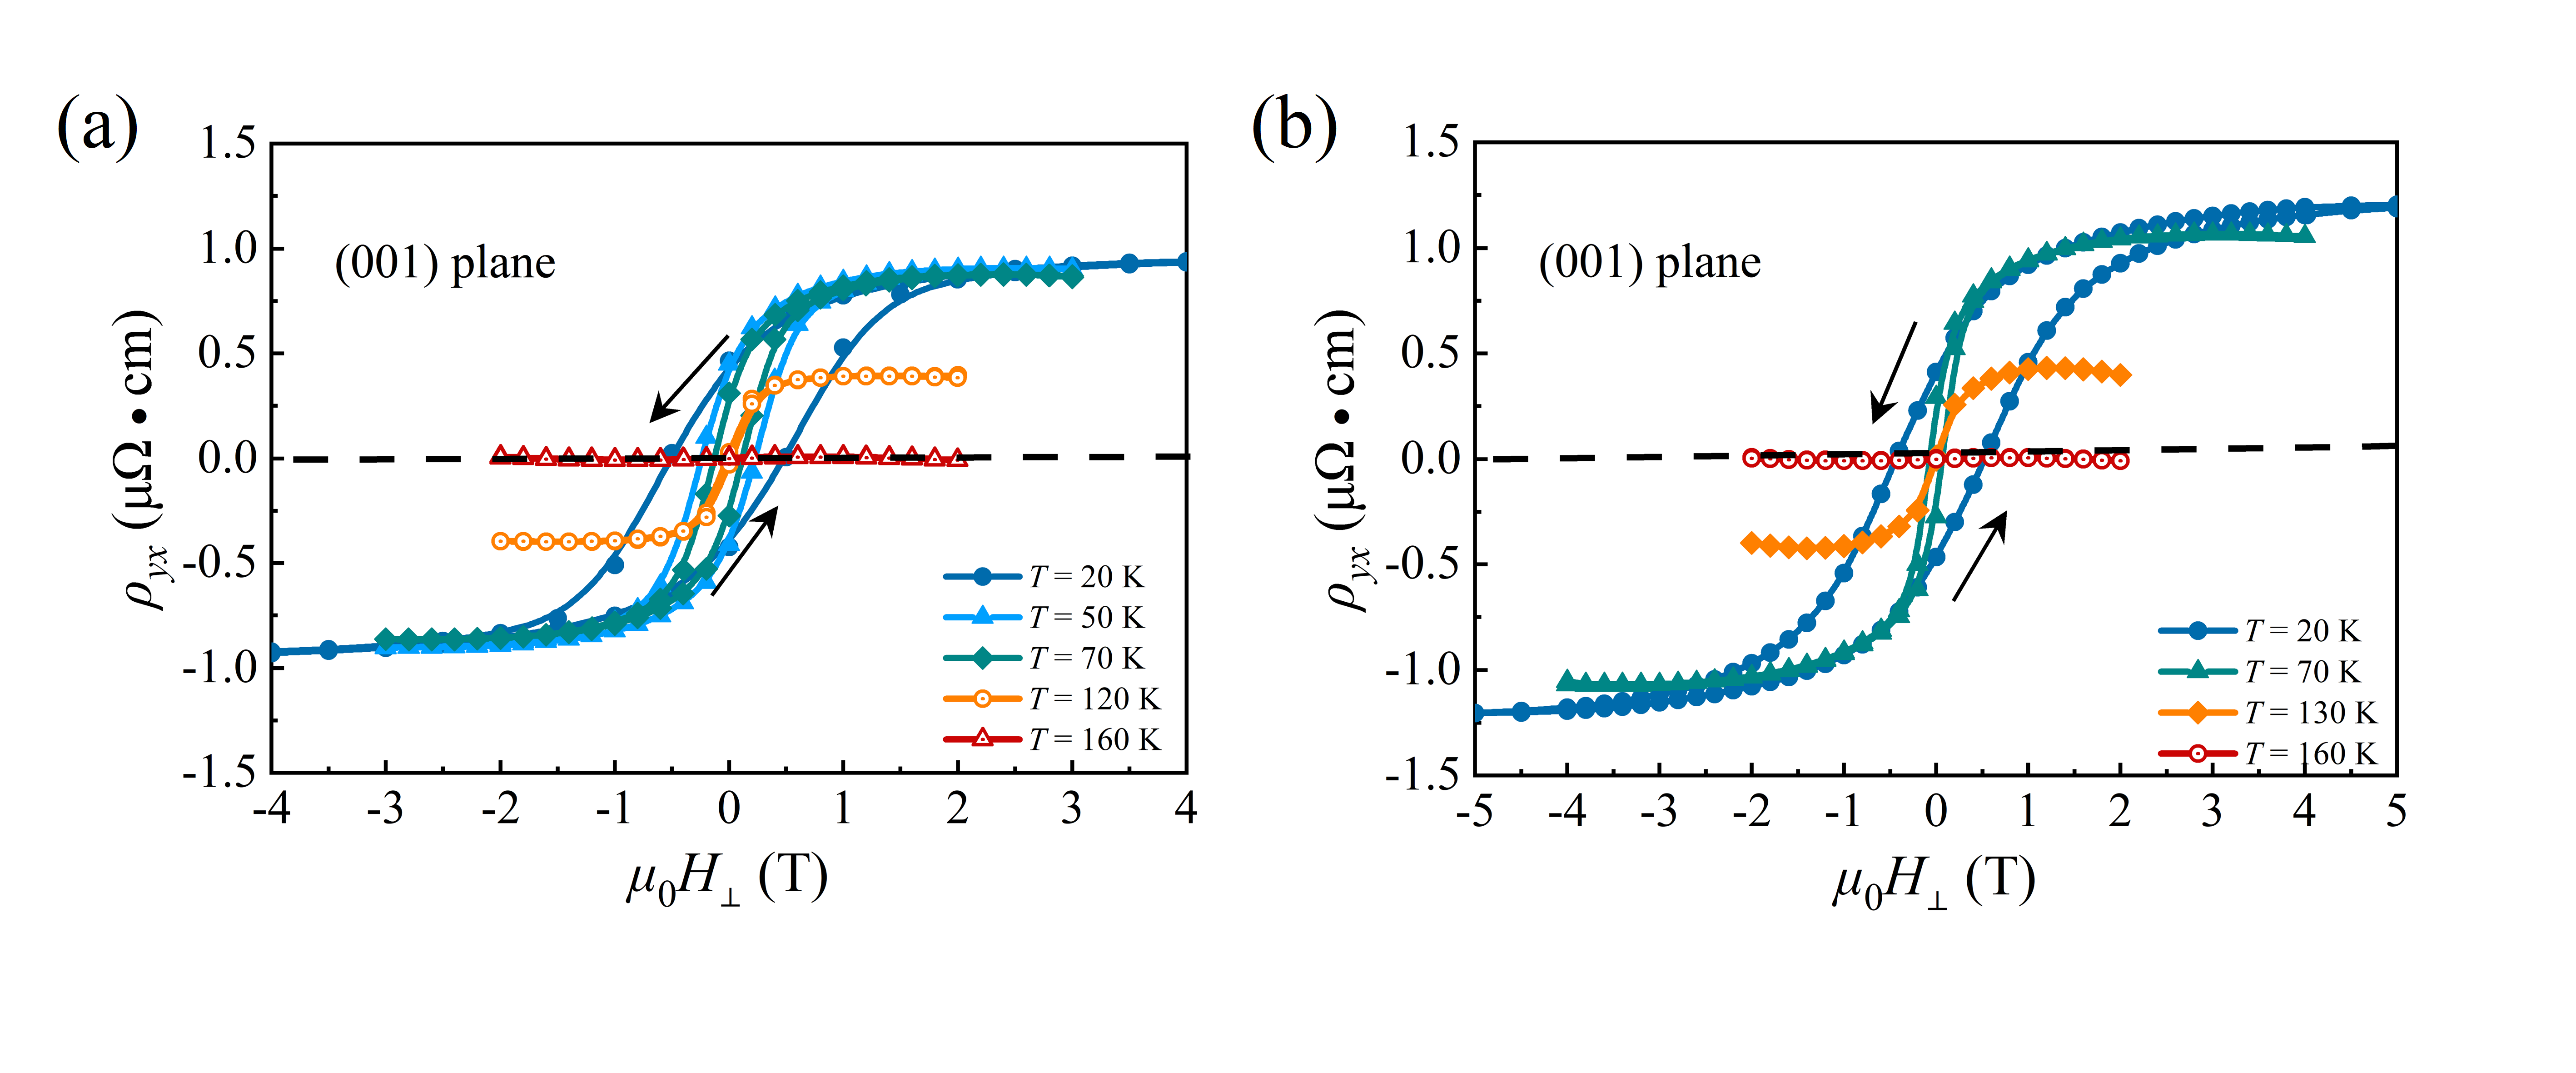


**Supplementary Fig. 4** Anomalous Hall resistivity (*ρ*yx) loops of (001)-oriented **a,** 20 nm-thin and **b,** 80 nm-thin Mn3GaN films at various temperatures.


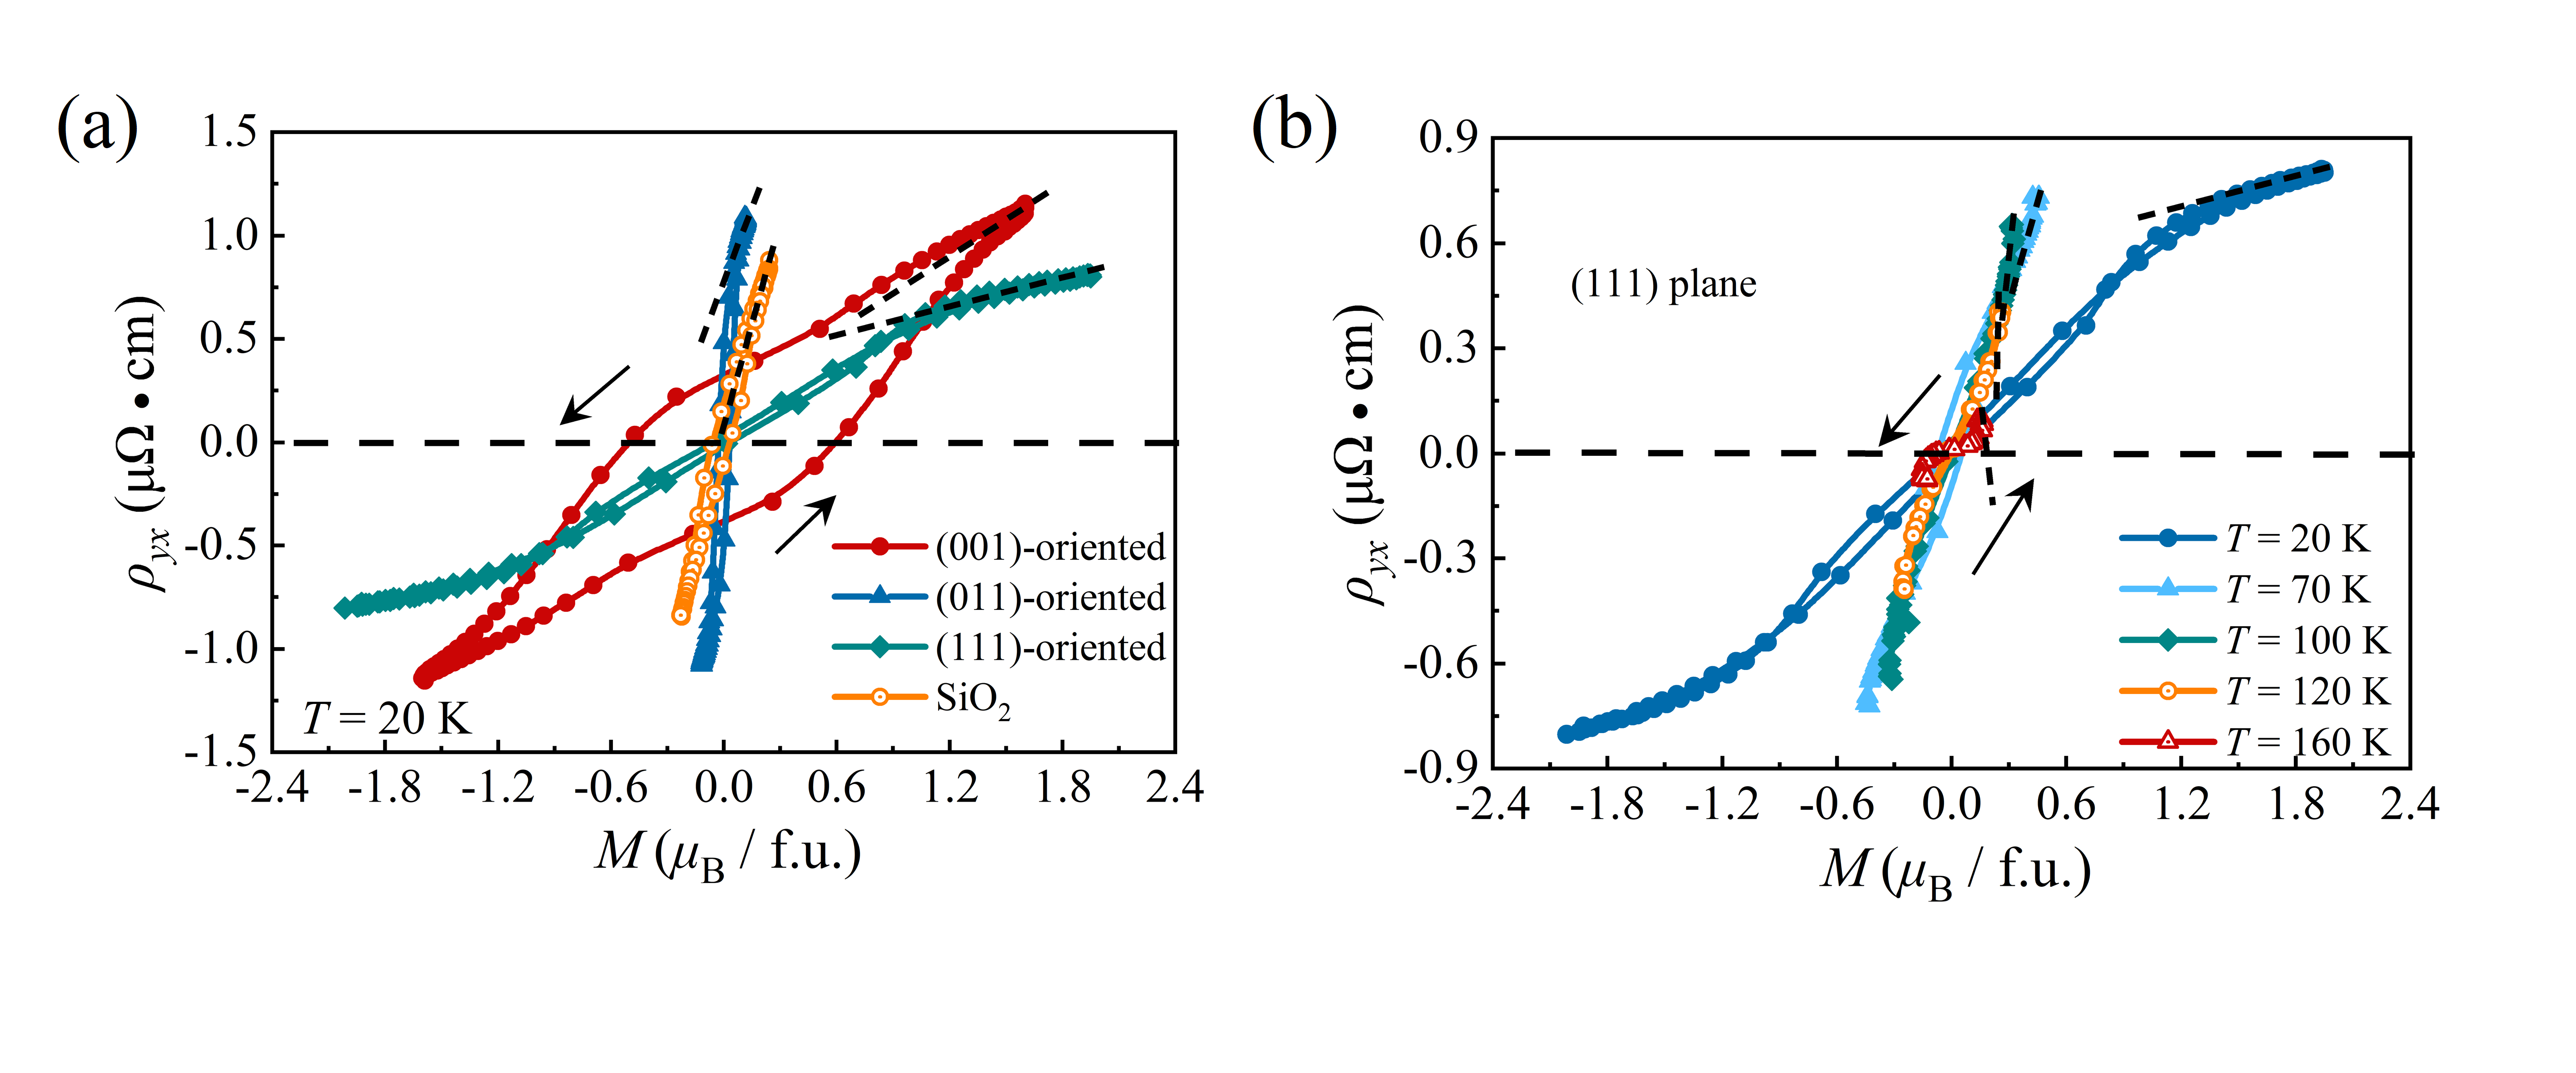


**Supplementary Fig. 5** Magnetization dependence of *ρ*yx for **a,** different orientations of Mn3GaN films at 20K and **b,** (111)-oriented Mn3GaN films at various temperatures.


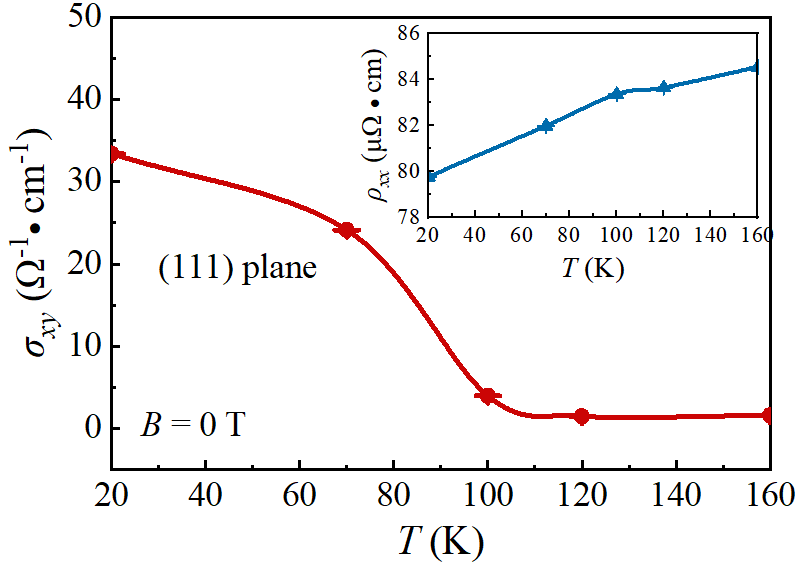


**Supplementary Fig. 6** Temperature dependence of the anomalous Hall conductivity *σ*xy at magnetic field *B* = 0 T of 40 nm-thin (111)-oriented Mn3GaN films. The inset graph presents the temperature dependence of the zero-field resistivity *ρ*xx.
